# Supplementary material for: The Role of Vimentin in Human Corneal Fibroblast Spreading and Myofibroblast Transformation
Source: Preprints.org preprint supplement (doi:10.20944/preprints202403.1042.v1), 2024-03-18
Supplement: Supplementary file 1 [file supplementary]

Figure S1. Vim KO cell spreading in 3D collagen matrices for 4 hours in the presence of PDGF and SF media. A) Representative pictures of samples that were fixed and labeled for F-actin. B) Graphs are morphological data from 3 different experiments. Bar is 50 μm.
